# Supplementary figures and images for: MicroRNA Expression Signatures Associated With BRAF-Mutated Versus KRAS-Mutated Colorectal Cancers
Source: PubMed Central journal article supplement — Medicine (Baltimore). 2016 Apr 18;95(15):e3321. doi: 10.1097/MD.0000000000003321 (PMC4839821; doi:10.1097/md.0000000000003321), 2016-04-18

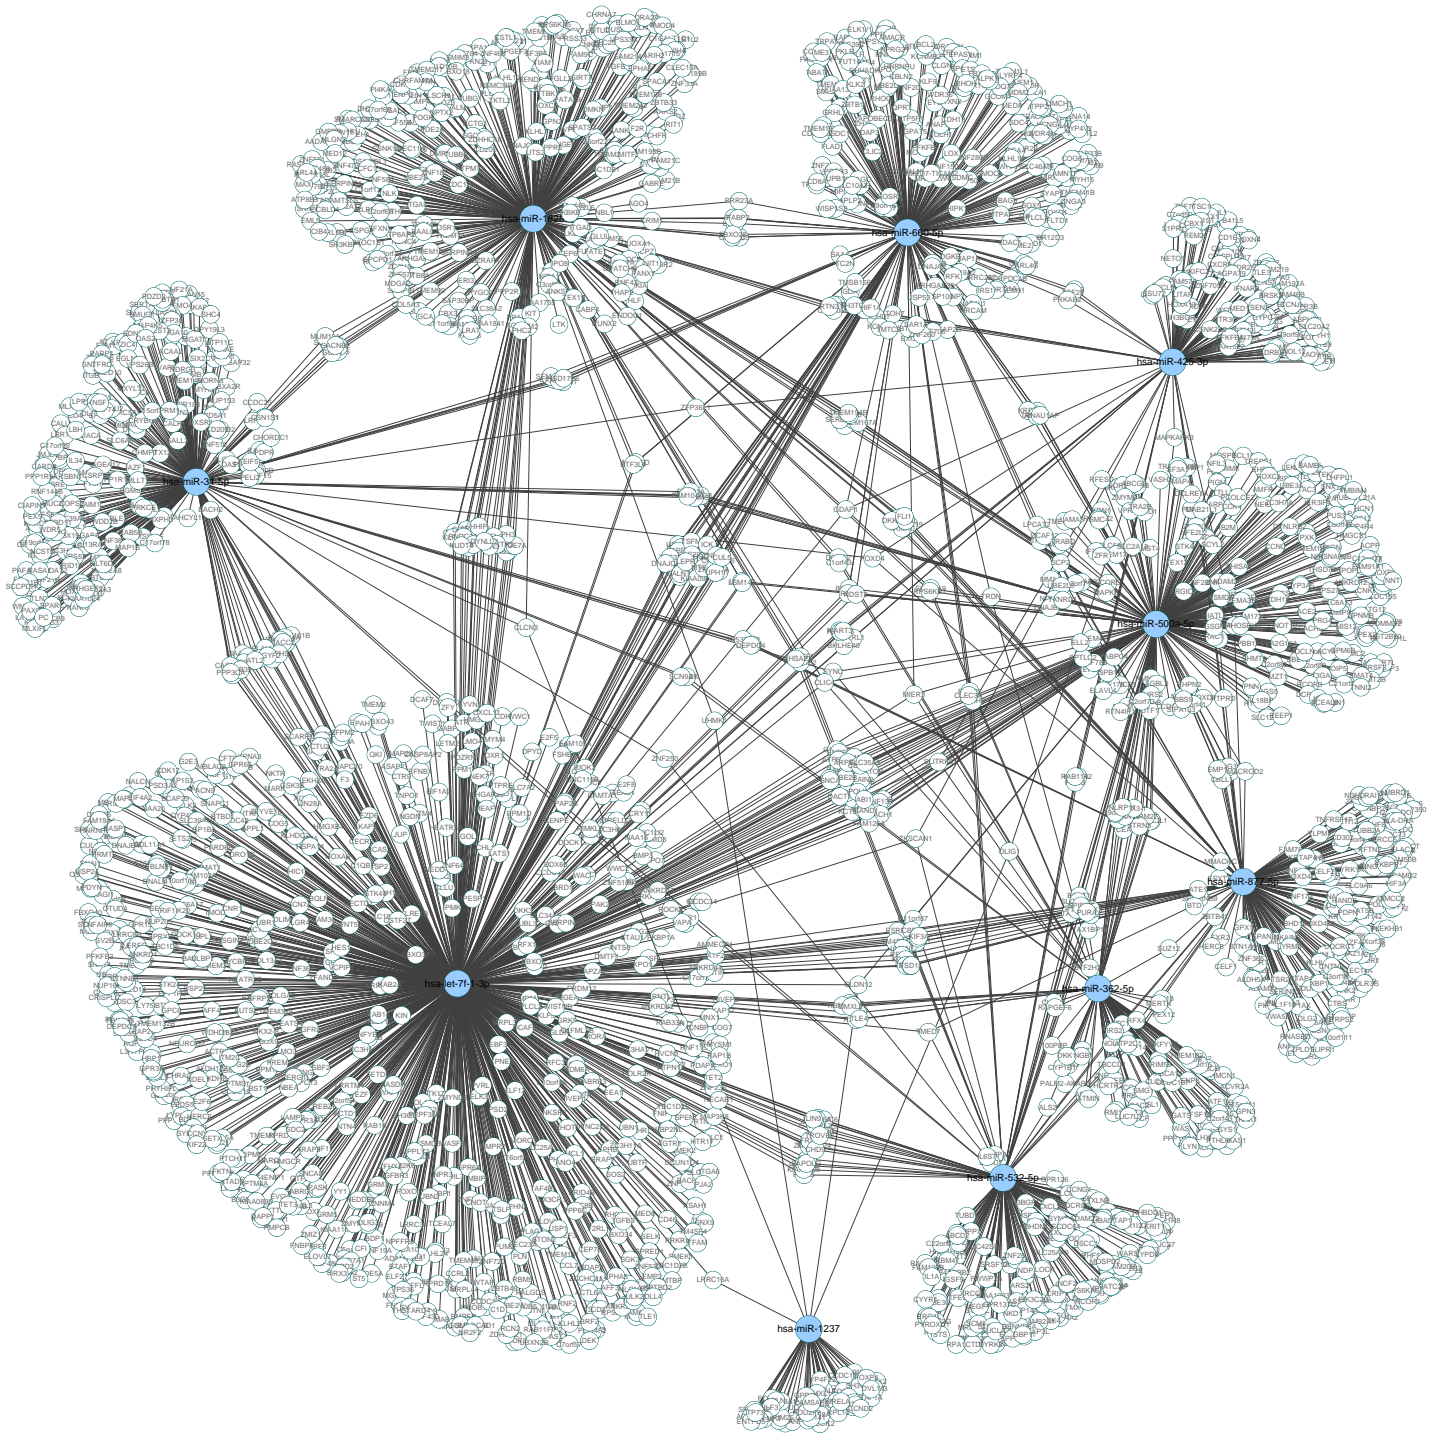

Supplement: medi-95-e3321-s001.pdf [file medi-95-e3321-s001.pdf]
